# Supplementary material for: Multifunctional IgG/IgM antibodies and cellular cytotoxicity are elicited by the full-length MSP1 SumayaVac-1 malaria vaccine
Source: PubMed Central journal article supplement (PMC10412566; doi:10.1038/s41541-023-00701-2), 2023-08-09
Supplement: 41541_2023_701_MOESM1_ESM.pdf [file 41541_2023_701_MOESM1_ESM.pdf]

**Title:** Multifunctional IgG/IgM antibodies and cellular cytotoxicity are elicited by the full-length MSP1 “*SumayaVac-1*” malaria vaccine in a phase I clinical trial

**Authors:** Micha Rosenkranz,<sup>1†</sup> Kristin Fürle,<sup>1†</sup> Julia Hibbert,<sup>1</sup> Anne Ulmer,<sup>1</sup> Arin Ali,<sup>1</sup> Thomas Giese,<sup>2</sup> Antje Blank,<sup>3</sup> Walter E. Haefeli,<sup>3</sup> Ernst Böhnlein,<sup>4</sup> Michael Lanzer,<sup>1</sup> Richard Thomson-Luque<sup>4\*</sup>

**Affiliations:**

<sup>1</sup>Center for Infectious Diseases-Parasitology, Heidelberg University Hospital, Heidelberg, Germany.

<sup>2</sup>Institute for Immunology, Heidelberg University Hospital and German Center for Infection Research (DZIF), Heidelberg, Germany.

<sup>3</sup>Clinical Pharmacology and Pharmacoepidemiology, Heidelberg University Hospital, Heidelberg, Germany.

<sup>4</sup>Sumaya-Biotech GmbH & Co. KG.

†Equally contributed

\*Corresponding author: Richard Thomson-Luque - email: [thomson-luque@sumaya-biotech.com](mailto:thomson-luque@sumaya-biotech.com)

## SUPPLEMENTARY FIGURES

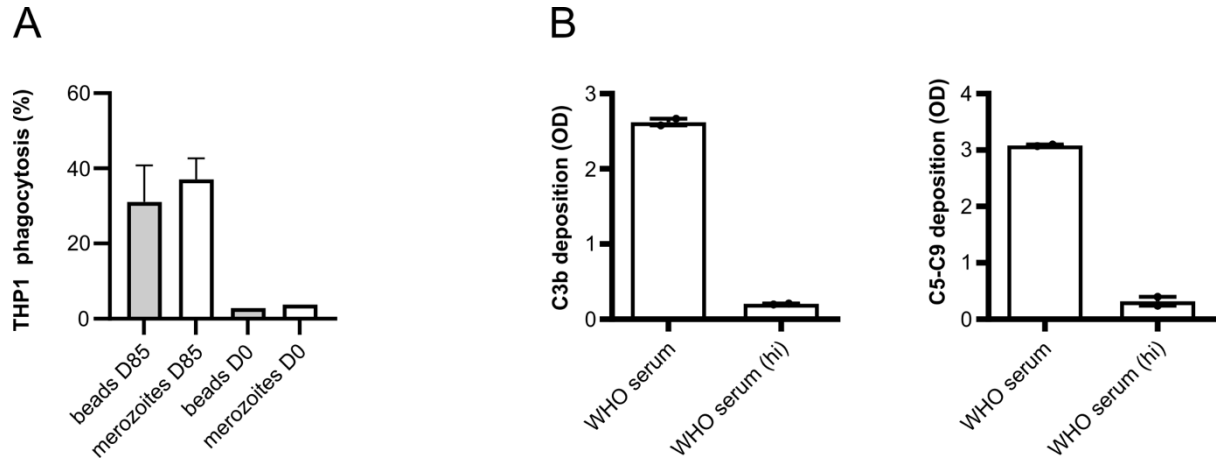

**Supplementary Figure 1: Experimental controls for phagocytosis and complement fixation assays. (A)** Phagocytosis of MSP1<sub>FL</sub>-coupled beads to merozoites by THP1 cells using pre-immune and post-immune IgG. No difference between the two approaches was observed. **(B)** The role of complement in the C3b and C5-C9 deposition assays was verified with the use of heat-inactivated WHO serum (Data file S1).

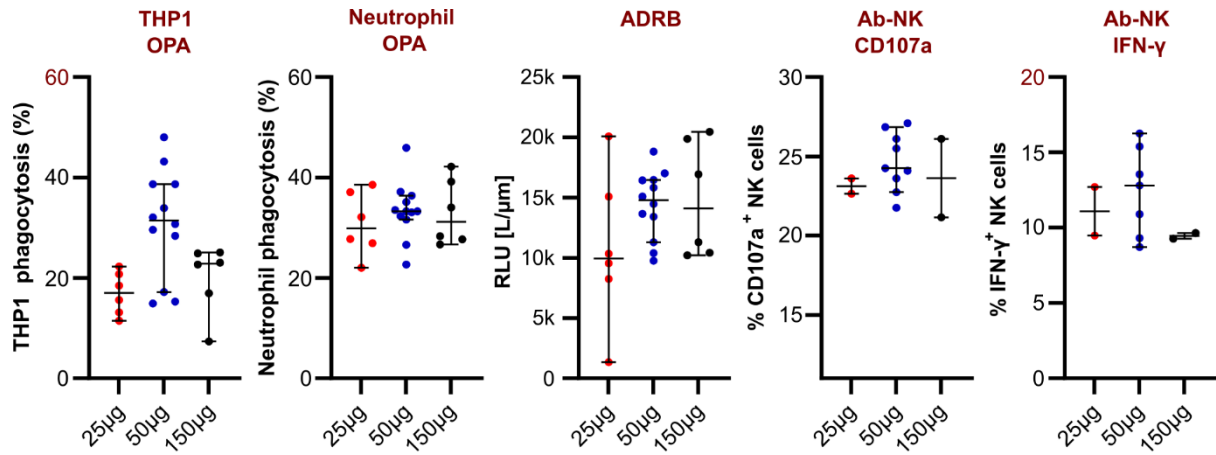

**Supplementary Figure 2: Functional activity of post-immune IgG was independent of the immunization dose.** Fc-mediated effector functions of post-immunization IgG (D85) was compared between the different doses (25µg; red dots, 50µg, blue dots and 150µg, black dots). Error bars represent the median plus 95% confidence intervals.

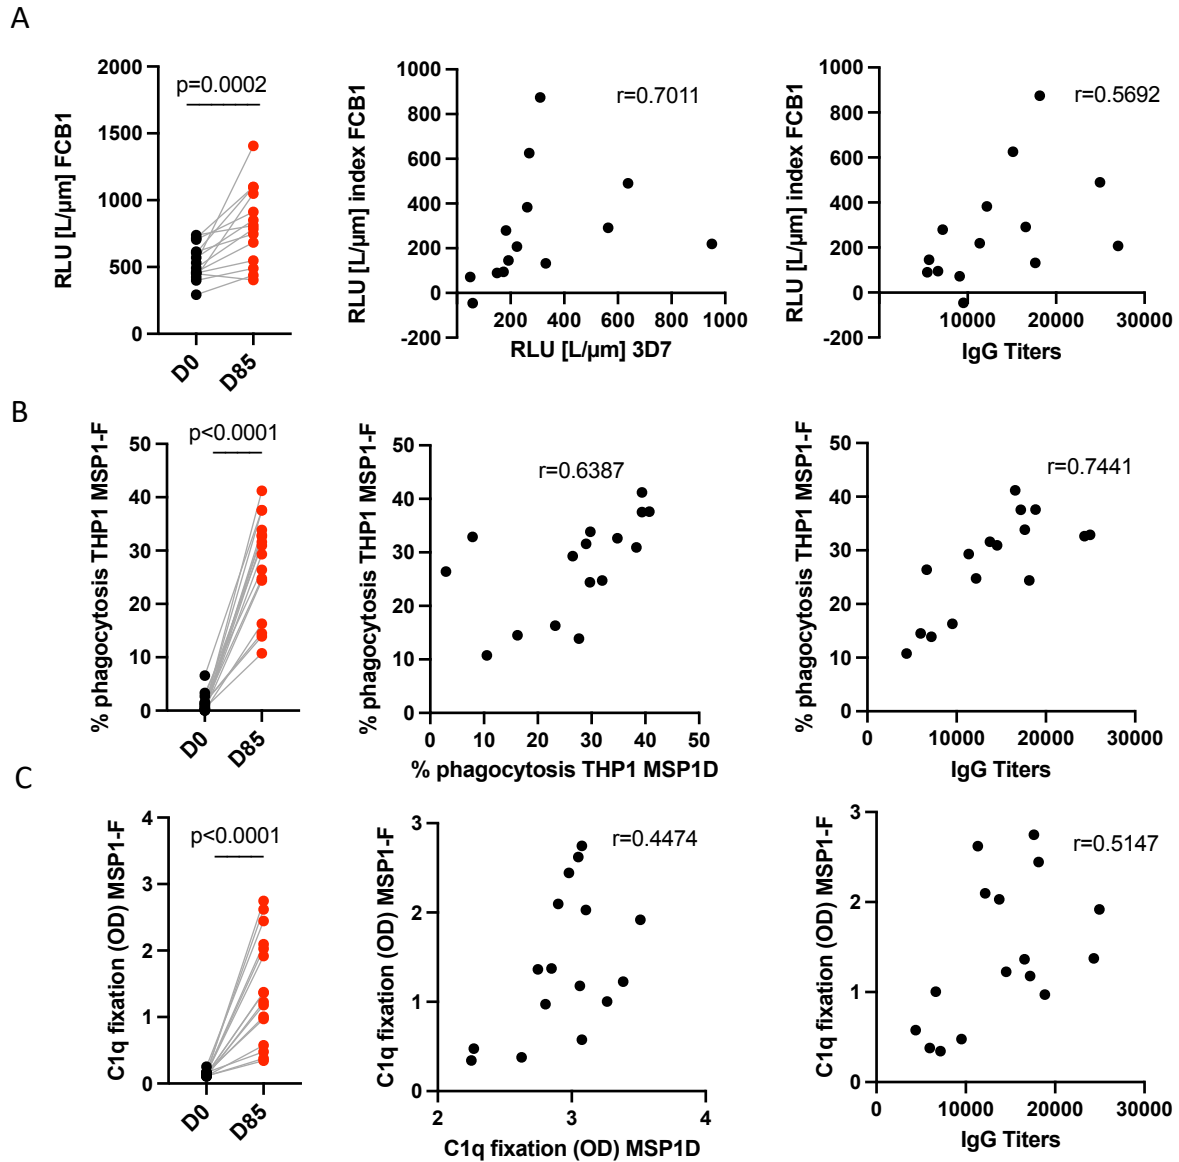

**Supplementary Figure 3: Illustration of cross-strain variability of antibody-mediated effector functions.** (A) From left to right: Significant changes in ADRB activity between D0 and D85 using the FCB1 strain ( $p=0.0002$ ) (left). Significant correlation in ADRB activity index (corrected for the background activity at day 0 at D85 of FCB1 vs 3D7 strains ( $p=0.0067$ )) (middle). Significant correlation in ADRB activity index of FCB1 vs IgG titers at day 85 ( $p=0.0366$ ) (right). (B) From left to right: Significant changes in OPA-THP1 activity between D0 and D85 using MSP1-F ( $p<0.0001$ ) (left). Significant correlation in OPA-THP1 activity at D85 using MSP1-F and MSP1-D ( $p=0.0091$ ) (middle). Significant correlation OPA-THP1 activity at D85 using MSP1-F vs IgG titers at D85 ( $p=0.0014$ ) (right). (C) From left to right: Significant changes in C1q fixation activity between D0 and D85 using MSP1-F ( $p<0.0001$ ) (left). Correlation trend in C1q fixation activity at D85 using MSP1-F and MSP1-D (middle). Significant correlation C1q fixation activity at D85 using MSP1-F vs IgG titers at D85 ( $p=0.0436$ ) (right). Statistical differences between timepoints were calculated using Wilcoxon ranked test. For correlations Spearman rank test was used.

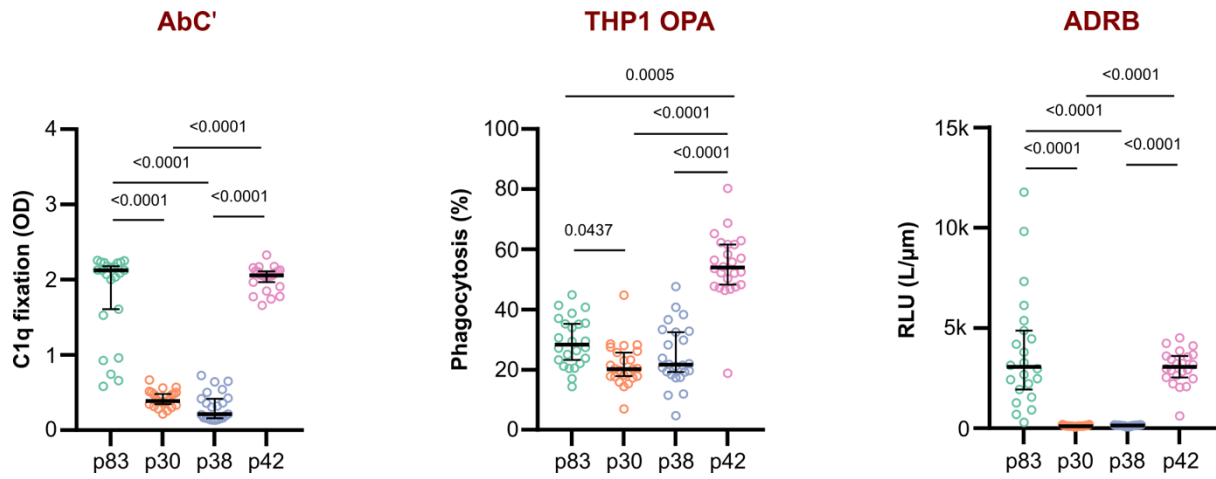

**Supplementary Figure 4: The p83 and p42 subunit are primary targets of functional antibodies.** Levels of post-immunization (D85) IgG-mediated AbC', THP1 OPA and ADRB were compared between MSP1 subunits. Error bars represent the median plus 95% confidence intervals. Statistical differences between timepoints were calculated using Friedmann test followed by Dunn's multiple comparisons test (Data file S3).

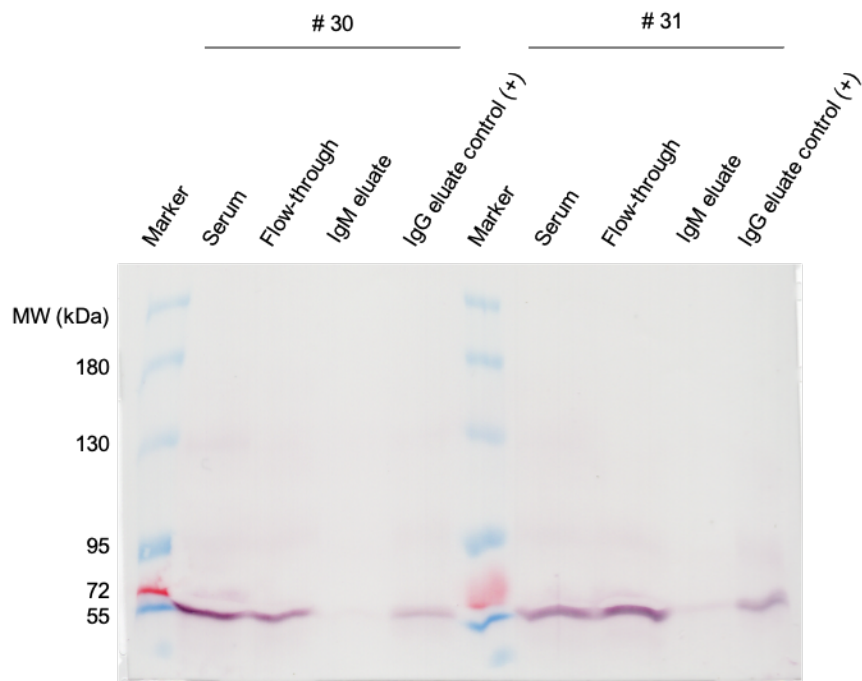

**Supplementary Figure 5: Western Blot showing marginal IgG content in the IgM-eluted fraction.** Reducing SDS-Page with loaded serum, flow-through and purified IgM and IgG samples Antibodies were detected using anti-human IgG-AP. Serum and flow-through of the IgM columns contain IgG, as expected. Eluate IgM served as negative control and does not contain IgG, as anticipated. Eluate IgG contains purified IgG.

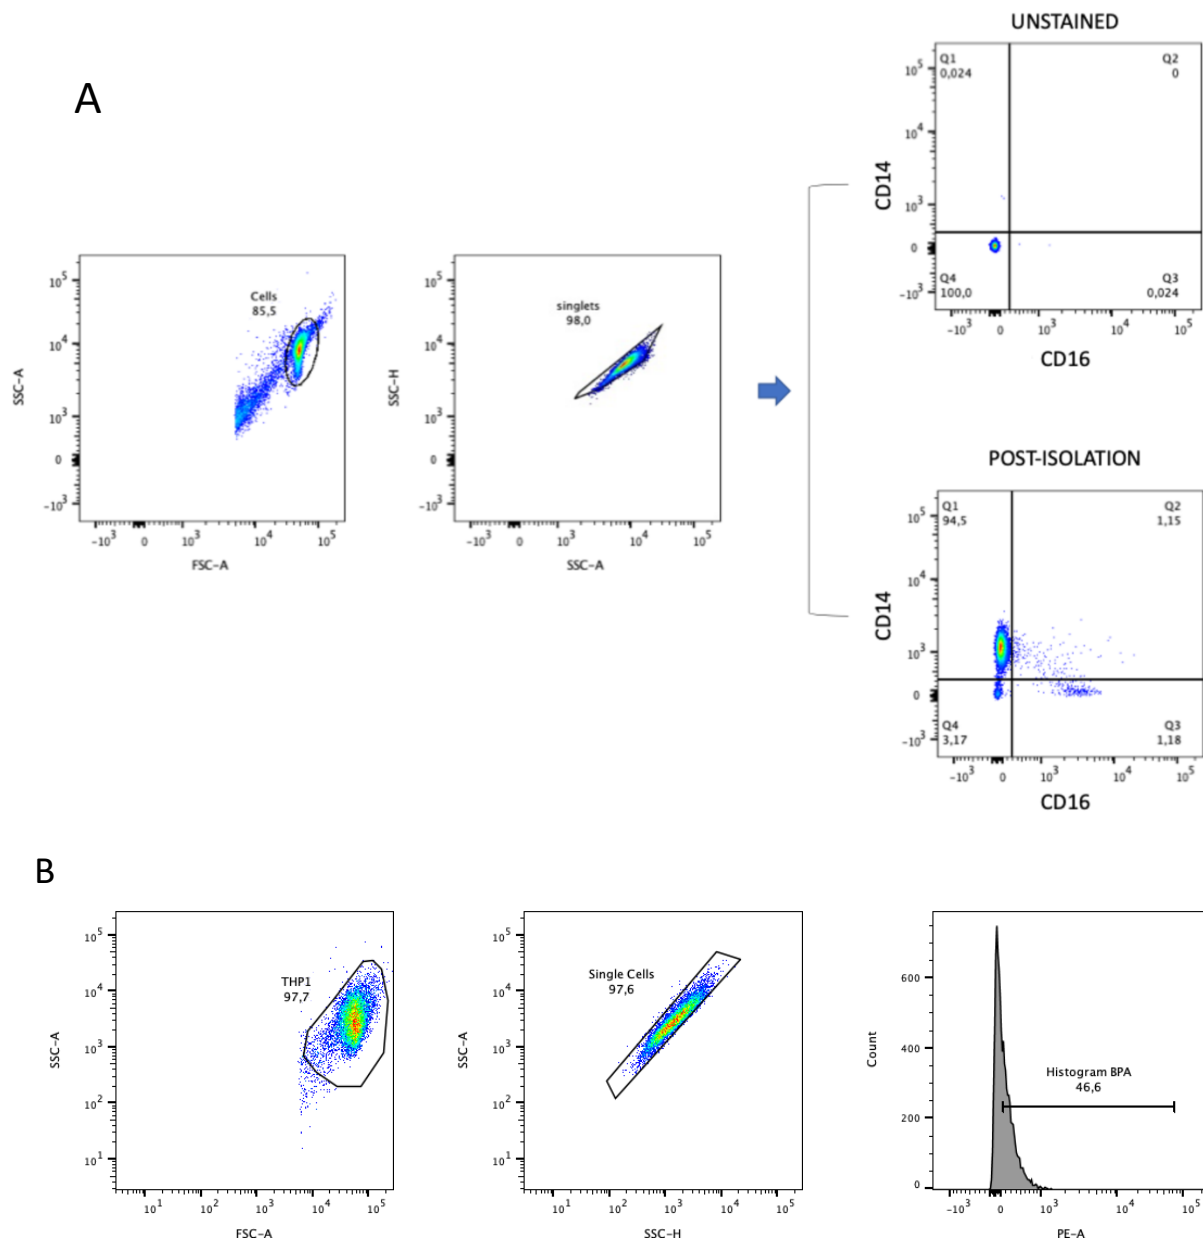

**Supplementary Figure 6: Flow cytometry gating strategies:** (A) Test for purity in the isolation of monocytes from peripheral blood: PBMCs were isolated from peripheral blood using density centrifugation and single cells were gated. A double staining CD14<sup>+</sup>/CD16<sup>+</sup> was used to verify a monocyte (CD14<sup>+</sup>) enrichment of at least 90%. (B) Gating strategy for OPA-THP1 cells. Analysis of the data was performed using FlowJo software 10.2.

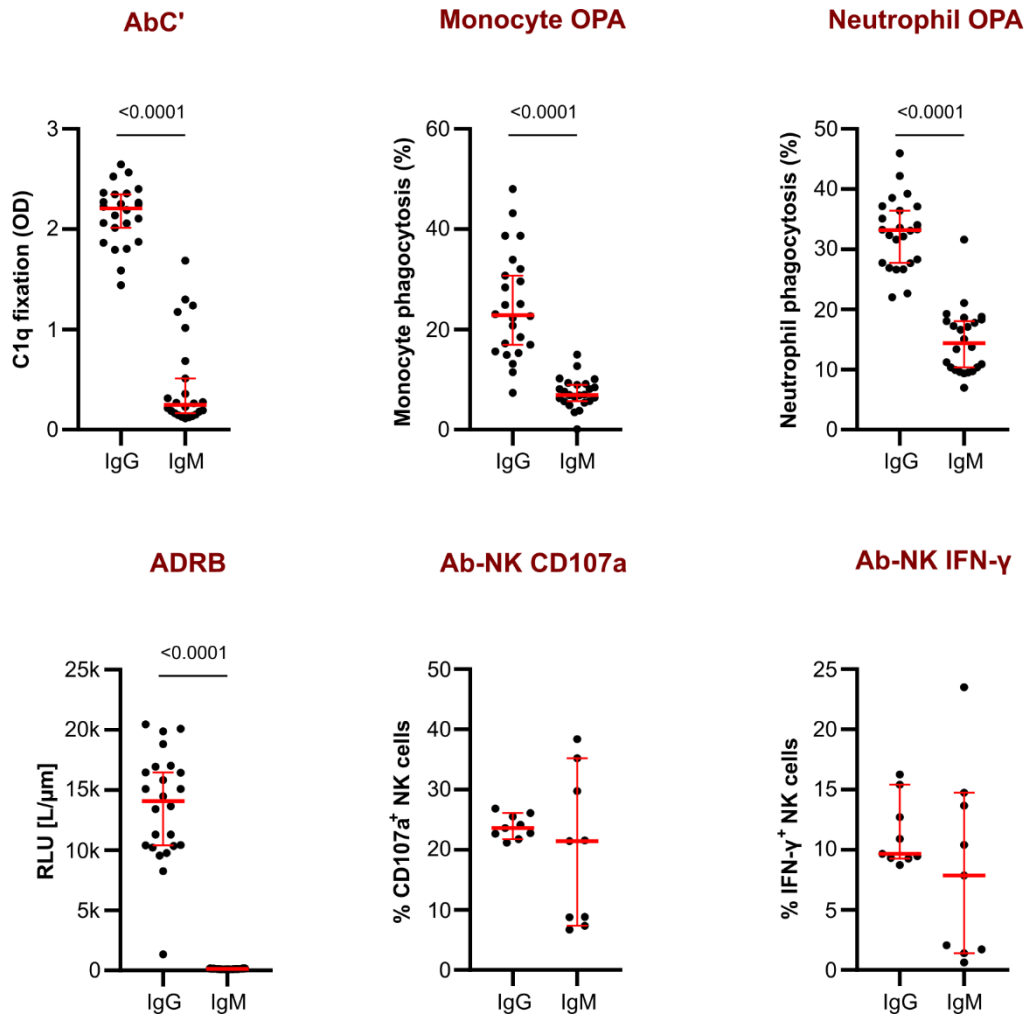

**Supplementary Figure 7: Magnitude of Fc-mediated functional activity induced by IgG is higher compared to IgM.** Levels of functional activity were compared between IgG and IgM post-immunization (D85). Error bars represent the median plus 95% confidence intervals. Statistical differences between IgG and IgM-mediated effector functions were calculated using Wilcoxon rank test.



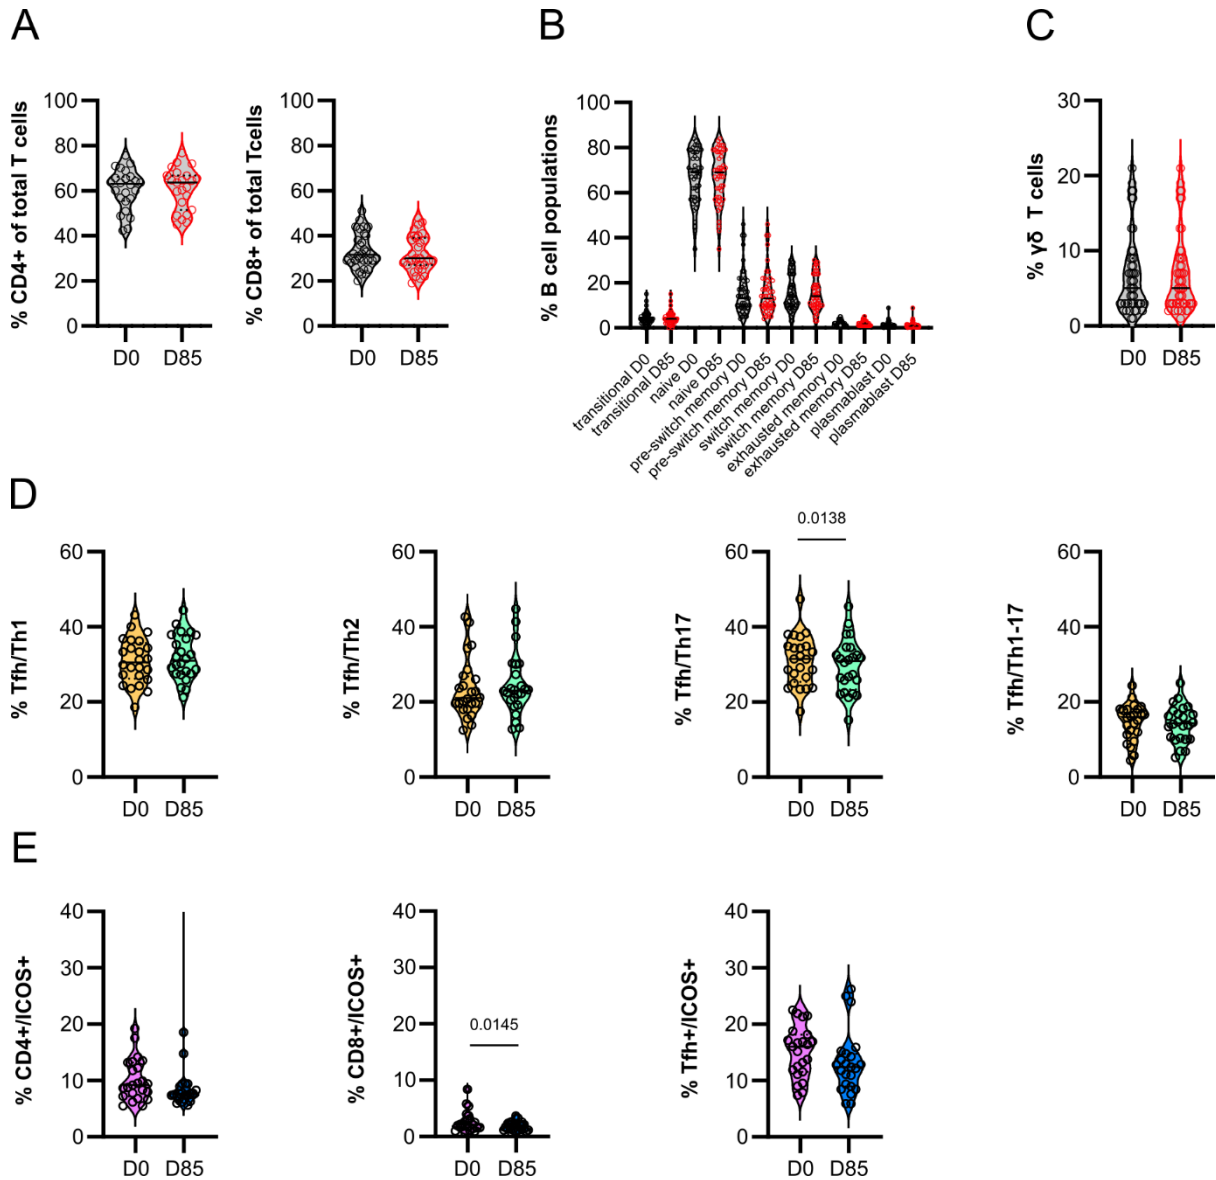

**Supplementary Figure 8: Pair-wise comparison of a comprehensive flow cytometry panel of lymphocyte subpopulations before and after the trial.** (A-C) No significant variation between day 0 and day 85 was observed for (A) CD4<sup>+</sup>, CD8<sup>+</sup> T, for (B) the different B cell subsets explored and for (C) the  $\gamma\delta$  T cell population (D) For most Tfh subpopulations no significant changes were observed over time, only Tfh17 showed slight decrease in cell frequency. (E) No significant variation between day 0 and day 85 for the marker of activation ICOS except for the CD8<sup>+</sup>/ICOS<sup>+</sup> subset (Data file S6).

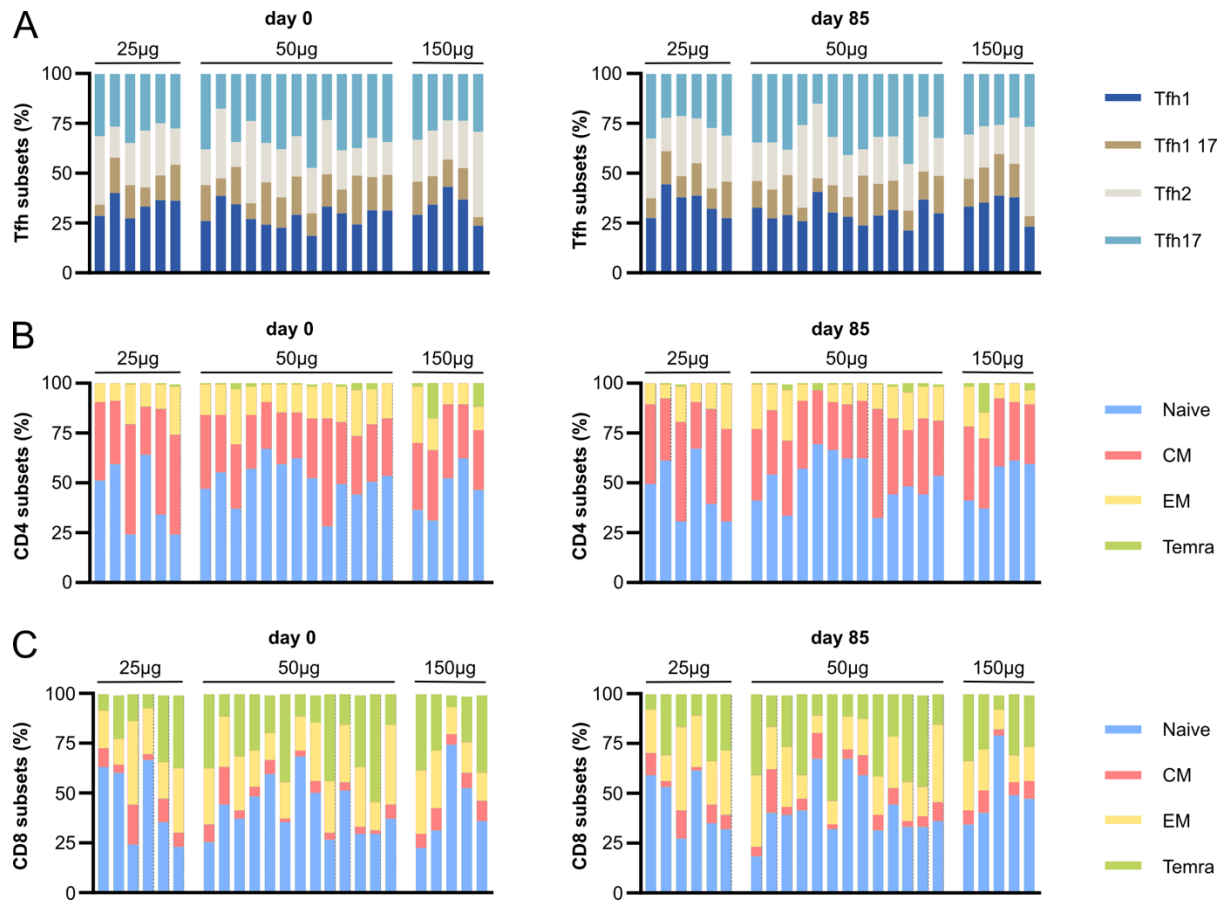

**Supplementary Figure 9: Tfh and CD4<sup>+</sup> and CD8<sup>+</sup> memory subpopulations of T cells at the individual level and regarding the dose of immunization with *SumayaVac1*. (A) Tfh cell subsets (Tfh1, Tfh2 and Tfh1-17) at day 0 and day 85. (B) Different memory phenotypes (naïve, central memory (CM), effector memory (EM) and TEMRA) of CD4<sup>+</sup> and CD8<sup>+</sup> T cells at day 0 and day 85 (Data File S6).**

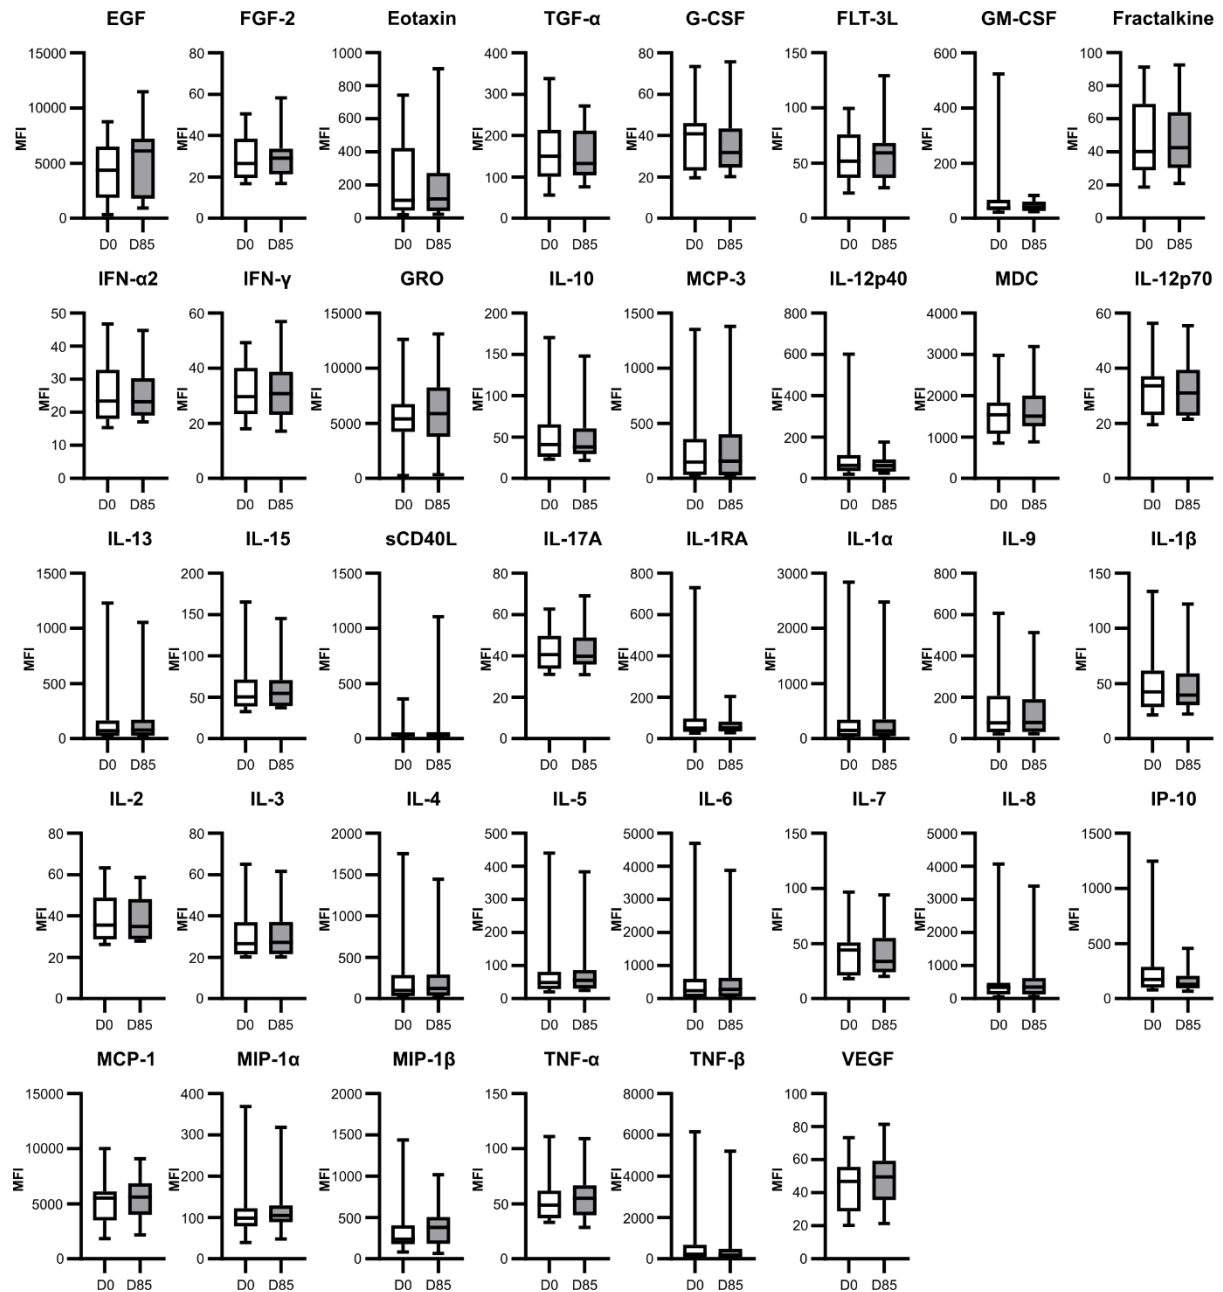

**Supplementary Figure 10: Panel of 38 cytokines measured using bead-based multiplex assay.** Cytokines EGF, FGF-2, Eotaxin, TGF- $\alpha$ , G-CSF, FLT-3L, GM-CSF, Fractalkine, IFN- $\alpha$ 2, IFN- $\gamma$ , GRO, IL-10, MCP-3, IL-12p40, MDC, IL-12p70, IL-13, IL-15, sCD40L, IL-17A, IL-1RA, IL-1 $\alpha$ , IL-9, IL-1 $\beta$ , IL-2, IL-3, IL-4, IL-5, IL-6, IL-7, IL-8, IP-10, MCP-1, TNF- $\alpha$ , TNF- $\beta$  and VEGF, comparing sera from day 0 (n=19) and day 85 (n=19) including all dosing groups. No differences were found in any of the cytokines tested (Data File S6).

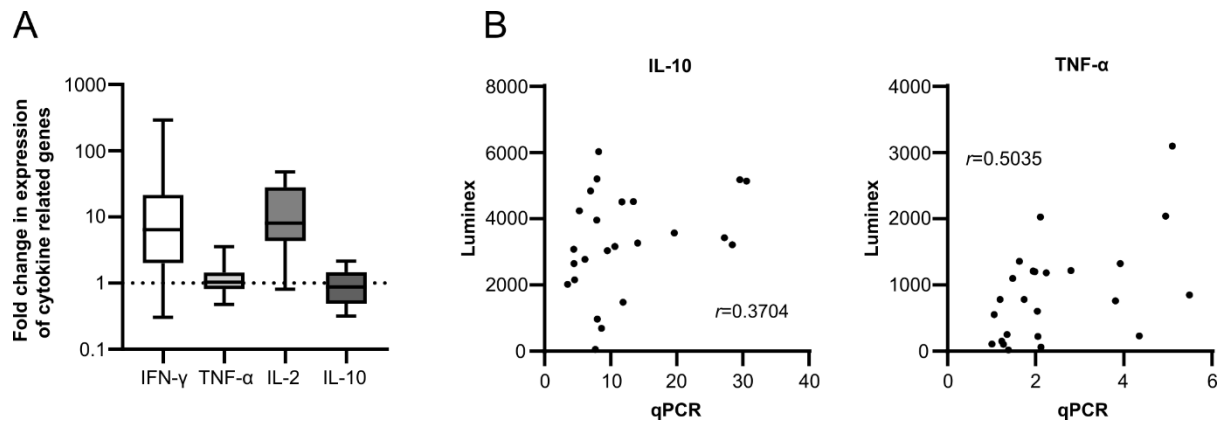

**Supplementary Figure 11: RT-qPCR and correlation with Multiplex bead assay.** (A) Fold change mRNA expression of cytokine related genes in PBMCs from vaccinees (day 85) compared to naïve PBMCs (day 0). The mRNA expression of IFN- $\gamma$ , TNF- $\alpha$ , IL-2 and IL-10 for day 0 and day 85 were measured by real-time PCR and relative quantification of MSP-1-stimulated PBMCs to unstimulated PBMCs. Boxplots illustrate the medians, the 25<sup>th</sup> and 75<sup>th</sup> quartiles and the range (n=12). The positive fold change in IFN- $\gamma$  and IL-2 mRNA gene expression shows the MSP1 specific memory immune response of vaccinated PBMCs. TNF- $\alpha$  and IL-10 mRNA gene expression does not change after vaccination. (B) Spearman correlations of relative gene expression measured by qPCR and Luminex of secreted TNF- $\alpha$ :  $r=0.50$ ,  $p=0.0121$ , and IL-10, (non-significant) (Data file S6).

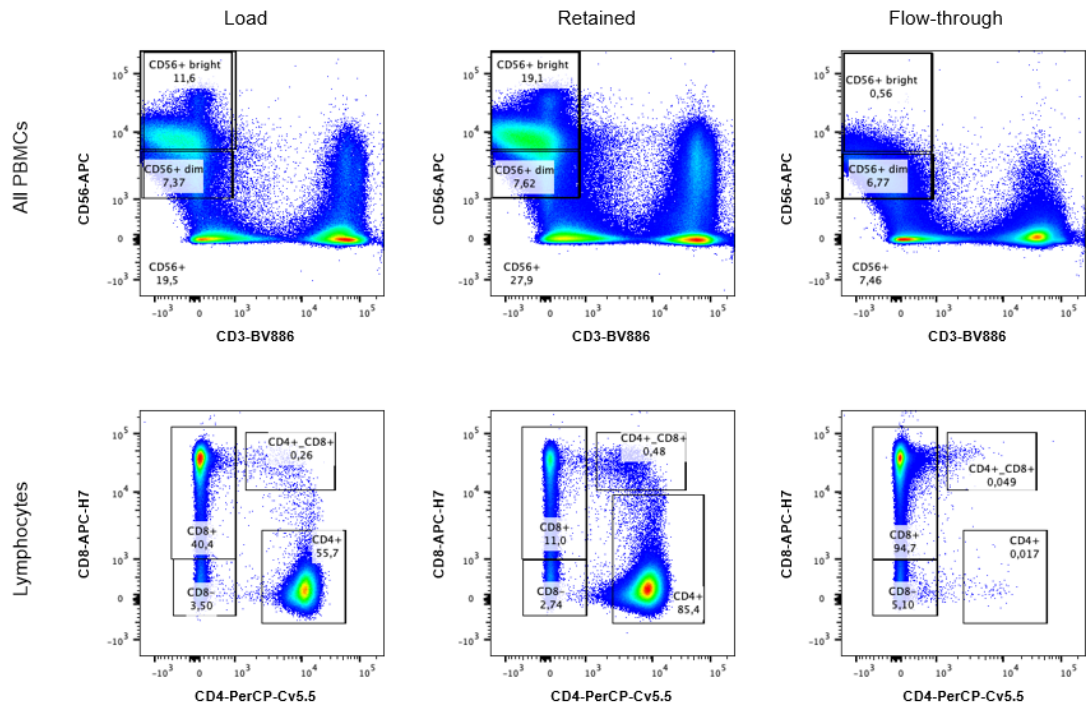

**Supplementary Figure 12: CD8<sup>+</sup> T cells population enrichment for a CD8<sup>+</sup>-specific ELISpot assay.** Upper panel: different subpopulations of total PBMCs Percentage of CD56<sup>+</sup> cells pre and post magnetic sorting studied (load, retained and flow-through); please see materials and methods. Lower panel: different subpopulations of lymphocytes based on their expression of CD4<sup>+</sup> and CD8<sup>+</sup> T cells in the different fractions pre and post magnetic sorting (load, retained and flow-through) (Data File S7).

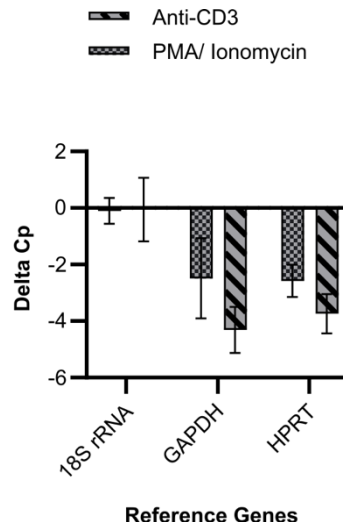

**Supplementary Figure 13: Stability of the reference gene candidates 18S rRNA, HPRT and GAPDH.** Evaluating the most stable reference gene for the relative quantification of cytokine related genes: PBMCs from 4 healthy volunteers were isolated, normalized against the unit cell amount and stimulated with PMA/Ionomycin and anti-CD3, respectively. The mRNA expression was detected by real-time PCR and data were analysed with the delta Cp method: Average  $\pm$  SD from the delta Cp of the different reference genes. Delta Cp was calculated by subtracting the Cp from the unstimulated PBMCs from the one of the stimulated PBMCs.

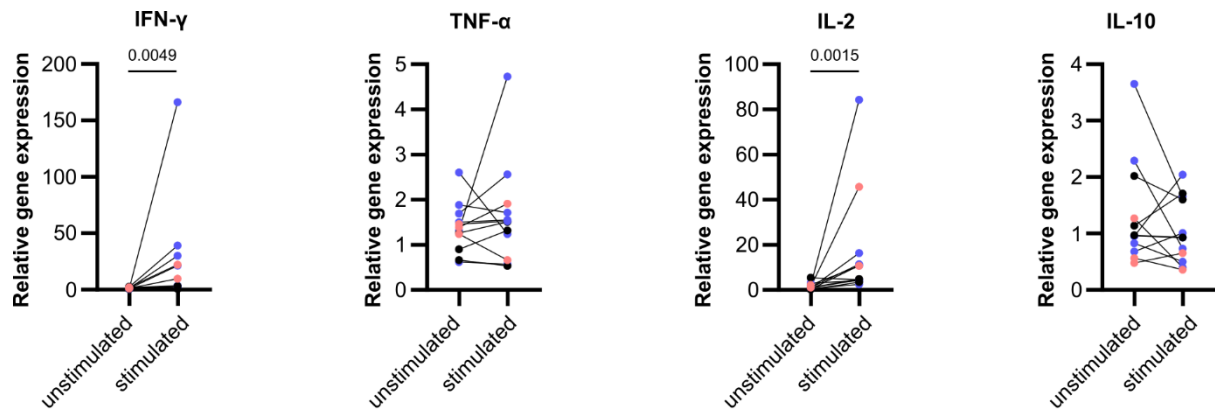

**Supplementary Figure 14: Relative gene expression in cytokine related genes due to vaccination with SumayaVac-1 in unstimulated and MSP-1 stimulated PBMCs.** The mRNA expression of IFN- $\gamma$ , TNF- $\alpha$ , IL-2 and IL-10 were measured by real-time RT-PCR. Relative quantification of day 85 PBMCs to the according day 0 PBMCs were done after 16h incubation in media (unstimulated) and MSP1-stimulation, respectively. One data point represents the gene expression in relative from day 85 to day 0, related to the corresponding culture condition. The dot colour represents vaccine dose (25  $\mu$ g; red dots, 50  $\mu$ g, blue dots and 150  $\mu$ g, black dots). A significant increase in IFN- $\gamma$  and IL-2 mRNA expression in the MSP1-stimulated compared to the unstimulated PBMCs was observed. Statistical differences between timepoints were assessed using Wilcoxon rank test.

| Median activity        | Sera D85             | IgG D85                | IgM D85            | IgG D182           | IgM D182          | IgG D210            | IgM D210          | IgG D365          | IgM D365          |
|------------------------|----------------------|------------------------|--------------------|--------------------|-------------------|---------------------|-------------------|-------------------|-------------------|
| ADRB-MSP1-D            |                      | 14068.5 (1335-20461.5) | 115 (84.5-184)     | 4953.5 (1823-9593) | 108 (88.5-169)    | 16673 (11114-29332) | 106 (79.5-136)    | 3393.5 (724-8291) | 96.5 (81.5-120)   |
| ADRB-3D7 merozoites**  |                      | 884.6 (49.4-950.7)**   |                    |                    |                   |                     |                   |                   |                   |
| ADRB-FCB1 merozoites** |                      | 798.0 (45.7-874.4)**   |                    |                    |                   |                     |                   |                   |                   |
| AbC'-C1q MSP1-D        | 2.6862 (2.25-3.51)*  | 2.21 (1.44-2.64)       | 0.245 (0.11-1.68)  | 0.70 (0.21-2.24)   | 0.17 (0.07-0.4)   | 2.01 (1.11-2.45)    | 0.25 (0.17-0.92)  | 0.43 (0.08-1.59)  | 0.12 (0.08-0.39)  |
| AbC'-C1q MSP1-F        | 1.3 (0.35-2.75)*     |                        |                    |                    |                   |                     |                   |                   |                   |
| AbC'-C3b               |                      | 2.2625 (1.59-2.49)     | 2.1735 (0.15-2.60) |                    |                   |                     |                   |                   |                   |
| AbC'-C5-C9             |                      | 3.4995 (2.99-3.86)     | 2.727 (0.79-3.18)  |                    |                   |                     |                   |                   |                   |
| OPA THP1/Mono MSP1-D   | 29.35 (2.91-39.4)*   | 22.85 (7.32-48)        | 6.9 (0.11-14.95)   | 6.21 (2-21)        | 5.743 (4.01-9.07) | 13.28 (7.12-36.6)   | 7.23 (4.78-14.45) | 7.06 (2.47-26.1)  | 6.144 (4.75-12.9) |
| OPA THP1/Mono MSP1-F   | 30.125 (10.75-41.2)* |                        |                    |                    |                   |                     |                   |                   |                   |
| OPA Neutro             |                      | 33.17 (22-45.95)       |                    | 21.15 (8.95-28.3)  |                   | 34.55 (23.6-41)     |                   | 18.35 (9.79-31.3) |                   |
| Ab-NK CD107a           |                      | 24.1 (21.15-27.1)      | 21.45 (6.71-38.35) | 23 (18.4-25.2)     | 6.99 (5.76-23)    | 24.25 (21.3-27.7)   | 14.98 (7.37-36.1) | 22.55 (18.9-24.8) | 6.67 (4.94-13.95) |
| Ab-NK IFN-γ            |                      | 10.91 (8.74-15.4)      | 7.85 (0.61-23.5)   | 10.9 (6.27-15.8)   | 1.03 (0.47-9.26)  | 12.6 (8.48-18.8)    | 4.46 (1.58-14.55) | 10.3 (5.2-13)     | 1.28 (0.53-4.17)  |

**Supplementary Table 1:** Side-by-side comparison of the median activity of Fc-mediated effector functions of IgG and IgM and the Fold change at day 85 between IgG (1mg/mL) when compared to IgM (2 mg/mL). (\*) Data using monocytes. (\*\*) ADRB results from Blank et al., npj vaccines 2020, using isoluminol.
